# Supplementary material for: Topical Anti‐Inflammatory Activity of Essential Oils of Alpinia calcarata Rosc., Its Main Constituents, and Possible Mechanism of Action
Source: Hindawi journal article supplement (doi:10.1155/2020/2035671), 2020-01-01

Graphical abstract:

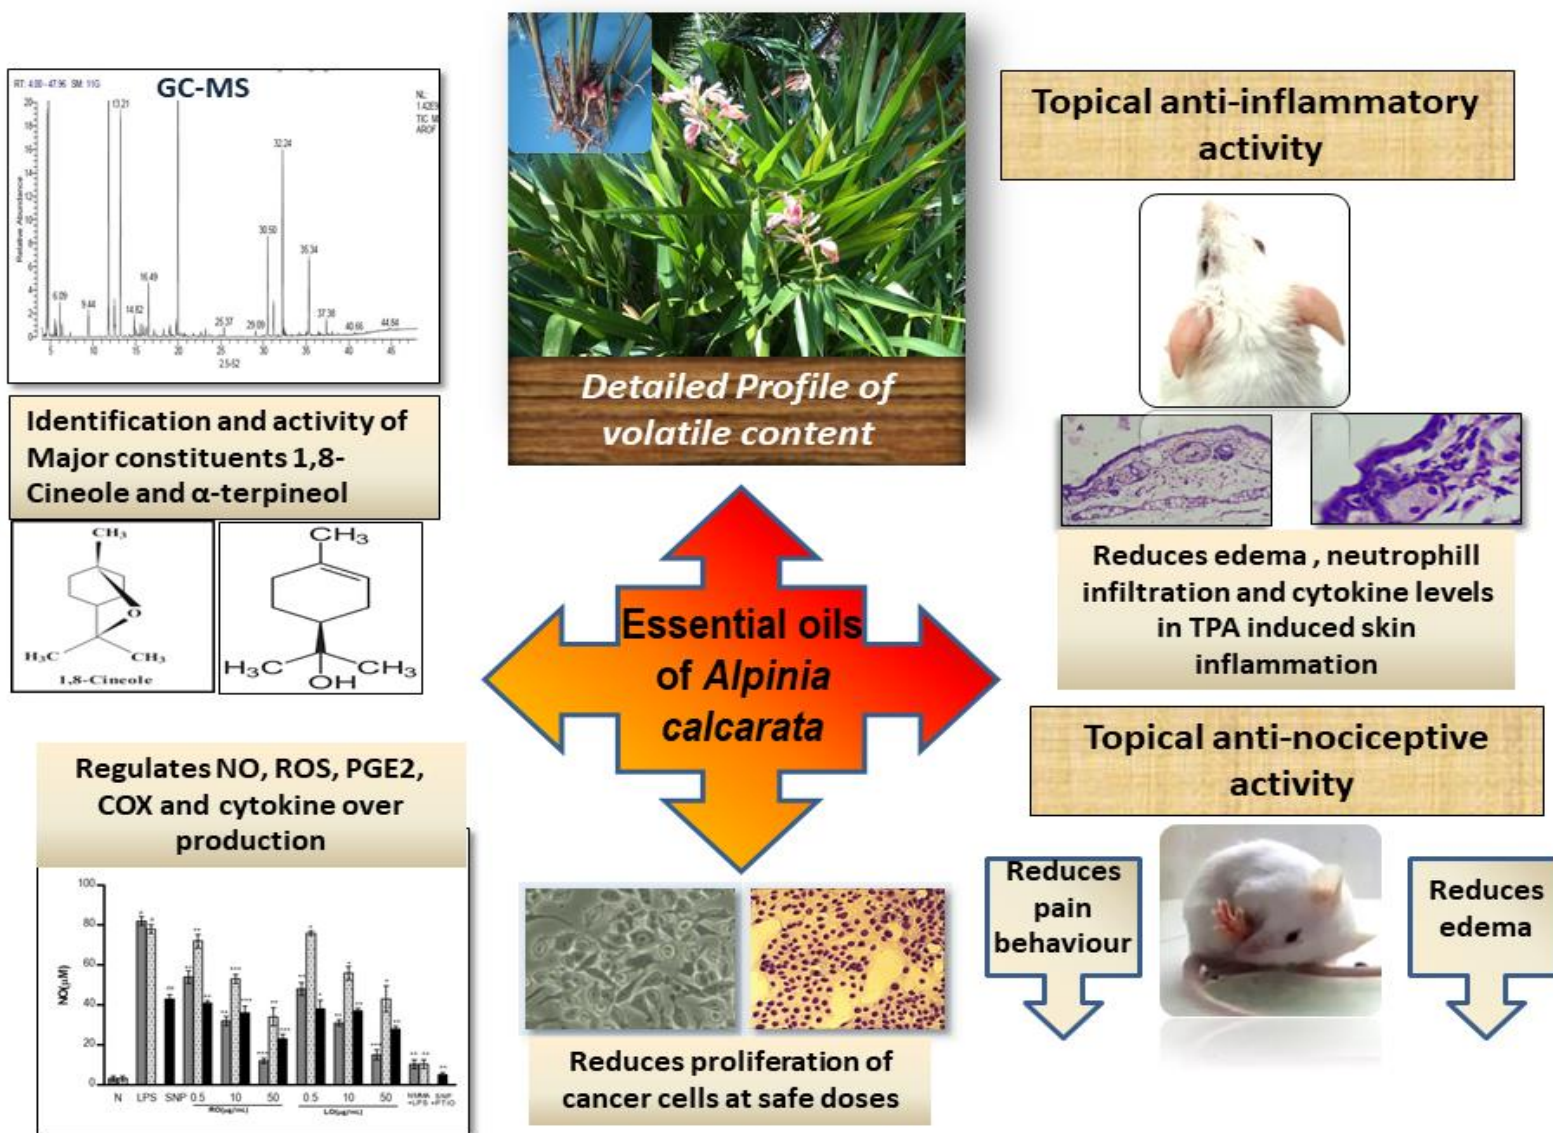

Supplement: f1 [file 2035671.f1.pdf]
